# Supplementary material for: Dolosigranulum pigrum Cooperation and Competition in Human Nasal Microbiota
Source: PubMed Central journal article supplement (PMC7485692; doi:10.1128/msphere.00852-20), 2020-09-09
Supplement: mSphere.00852-20-s0001.pdf [file mSphere.00852-20-s0001.pdf]

## Supplemental File S1. Supplemental Genomic Structure Analysis

### Results: Supplemental File S1

**The core genome of *D. pigrum* shows a high degree of sequence conservation.** From the nucleotide sequences of the 11 *D. pigrum* strains (**Tables A and B**), an estimate of the upper bound of a conservative core genome for *D. pigrum* is 1200 coding sequences (CDS) based on the overlap of three ortholog prediction algorithms (**Figure A**). Two of these algorithms together estimated a lower bound of 1513 CDS for the *D. pigrum* accessory genome within a pangenome of 2729 CDS (based on an estimated core of 1216 CDS) (**Figure B and Table C**). Similarity matrices of the core genes and proteins from the 11 *D. pigrum* strains revealed a high degree of nucleotide ( $\geq 97\%$ ) and amino acid ( $\geq 96.8\%$ ) sequence conservation (**Figure C. i and C. ii**, respectively).

To gain insight into the chromosomal structure of *D. pigrum*, we closed the genomes of two strains, CDC 4709-98 and KPL1914 using SMRT sequencing. MAUVE alignment revealed large blocks of synteny between these two closed genomes (**Figure D**). Synteny analysis of the bidirectional best-hits core proteins from the RAST annotation revealed 1143 syntenic clusters (of 1206 total BDBH clusters). Ring plots using the closed genome of CDC 4709-98 as the reference (**Figure E. i**), because it is 5% (97 kb) larger than that of KPL1914 (**Figure E. ii**), showed discrete areas of sequence absence in KPL1914 (**Figure E. iii**) along with large areas of conservation. Similar areas of absence were visible when the other 9 strains were also compared to CDC 4709-98 (**Figure E. iv**).

### **A core-genome phylogeny reveals relationships between the 11 *D. pigrum* strains.**

In 16S rRNA gene-based phylogenies *D. pigrum* clades with other lactic acid bacteria and shares the closest node with *Alloiococcus otitis* (previously designated *A. otitidis*); both

species are within the family *Carnobacteriaceae* (order *Lactobacillales*) (1). Genomic content also identified *A. otitis* as its closest genome-sequenced neighbor by RAST. Using *A. otitis* ATCC 51267 as an outgroup, a core-genome, maximum likelihood-based phylogeny revealed a monophyletic *D. pigrum* clade (**Figure F**). Although the 11 strains were isolated from different individuals in different geographic regions, mostly in the late 1990s (**Table B**), there was a relatively small evolutionary distance. We next analyzed the predicted functions encoded in these *D. pigrum* genomes.

### **Methods: Supplemental File S1**

**Selection of strains and preparation of DNA for whole genome sequencing.** *D. pigrum* KPL1914 was isolated from the nostril of a healthy adult. In addition, we selected 9 of 27 *D. pigrum* strains from a CDC collection (2) using an *rpoB*-based typing system with a preference for strains isolated from the nasal passages and/or from children (**Table A**). Primers Strepto F MOD (AAACTTGGACCAGAAGAAAT) and R MOD (TGTAGCTTATCATCAACCATGTG) were generated *in silico* by mapping primers Strepto F and R (3) to the *rpoB* sequence of *D. pigrum* ATCC 51524 (genome obtained from NCBI; RefSeq: NZ\_AGEF00000000.1) with BLAST (4) and manually correcting misalignments in SnapGene viewer 2.8.2 (GSL Biotech, Chicago, IL). PCR were performed using extracted genomic DNA of *D. pigrum*. PCR conditions were as follows: initial denaturation 95°C for 2 minutes, then 30 cycles of denaturation for 30 seconds at 98°C, annealing at 50°C for 30 seconds, elongation 72°C for minutes and a final extension step at 72°C for 10 minutes. PCR products were cleaned using QIAquick PCR purification kit (Qiagen, Germantown, MD) and sequence determined by Sanger sequencing (Macrogen USA, Boston, MA, USA). In the genomic analysis, we also included the

publicly available genome for *D. pigrum* ATCC 51524, which was sequenced by the BROAD institute as part of the HMP (RefSeq NZ\_AGEF00000000.1).

*D. pigrum* strains were grown atop membranes for 48 hrs as described above. Cells were harvested with a sterile tip, resuspended in 50 µl of sterile PBS and frozen at -80°C. Genomic DNA was extracted using the Epicentre MasterPure nucleic acid extraction kit (Epicentre, Madison, WI) per the manufacturer's instructions. We assessed DNA purity using a Nanodrop spectrophotometer (Nanodrop, Wilmington, DE), concentration using Qubit fluorometer (Invitrogen, Carlsbad, CA) and fragment size/quality via agarose gel electrophoresis.

**Whole genome sequencing, read assembly, and annotation (Table B).** Genomic DNA was sequenced at the Yale Center for Genome Analysis (YCGA), New Haven, CT, on an Illumina MiSeq platform using paired-end (2 x 250 bp) technology, assembled using de Bruijn graph algorithms with Velvet (5) with a kmer size of 139 bp and annotated with RAST with FIGfam release 70 (6) and Prokka (7). In addition, *D. pigrum* strains KPL1914 and CDC 4709-98 (2) were sequenced on a PacBio RS II (Pacific Biosystems, Menlo Park, CA) and sequences were assembled using HGAP version 3.0 (8). We used an iterative procedure to error correct the PacBio genomes, which involved mapping Illumina reads to the PacBio genomes until there were no differences detected between the Illumina reads and the PacBio assembly (9). To estimate the degree of assembly errors and missing content that might contribute to the variation in gene content, we compared the Illumina assembly of KPL1914 with the Illumina-corrected PacBio assembly of KPL1914 to estimate the possible divergence (10). Within Illumina assemblies, we identified 139 (1566 vs. 1705) predicted coding sequences as determined by RAST

annotation absent in the assembly received by PacBio sequencing. Genomes were deposited at NCBI (GenBank: NAJJ000000000, NAQW000000000, NAQX000000000, NAQV000000000, NAQU000000000, NAQT000000000, NAQS000000000, NAQR000000000, NAQQ000000000 and NAQP000000000 in BioProjects PRJNA379818 and PRJNA379966).

**Identification of the *D. pigrum* core, shell and cloud genome based on Illumina-sequenced genomes from 11 strains (Figures A and B and Table C).** Core proteins from RAST-annotated GenBank-files were determined using the intersection of bidirectional best-hits (BDBH), cluster of orthologous (COG) triangles and Markov Cluster Algorithm (OrthoMCL) clustering algorithms using GET\_HOMOLOGUES package version 02012019 on Ubuntu-Linux (11). Clustering for each of the three algorithms was performed with ./get\_homologues.pl (with default parameters) and the intersection of the three was calculated with ./compare\_clusters.pl excluding proteins with more than one copy in an input species, as single-copy proteins are safer orthologues, (i.e., flag -t 11). GenBank files derived from RAST annotation (see above) were renamed with KPL strain names except for strain ATCC51524. We determined the cloud, shell and core genome of each of the 11 sequenced *D. pigrum* strains using the parse\_pangenome\_matrix.pl script (./parse\_pangenome\_matrix.pl -m sample\_intersection/pangenome\_matrix\_t0.tab -s) of the GET\_HOMOLOGUES package version 02012019 (11). Definition of cloud, shell and core genome were based on (12). In brief, cloud is defined as genes only present in 1 or 2 genomes (cut-off is defined as the class next to the most populated non-core cluster class). The core genome is composed of clusters present in all 11 strains, soft core contains clusters present in 10 genomes and shell includes clusters present in 3 to 9

genomes. Synteny analysis (**Figure D**) on BDBH core (with flag -t 11) was performed using the `compare_clusters` script (-s) and synteny visualization was done in MAUVE using standard settings (13) after the KPL1914 genome was reverse complemented and both genomes had the origin set at the beginning of *dnaA*.

**Phylogenetic reconstruction, sequence and protein similarities.** A monophyletic (clade) core genome phylogenetic tree was constructed by including *A. otitis* (closest neighbor based on the Living Tree Project (1)) an outgroup (**Figure F. i**). A phylogenetic tree without an outgroup was also constructed similarly (**Figure F. ii**). *A. otitis* ATCC 51267 contigs were downloaded from NCBI (NZ\_AGXA000000000.1) and annotated using RAST (see above). Predicted core proteins common to *A. otitis* and *D. pigrum* genomes were identified as described above using GET\_HOMOLOGUES package version 02012019. Alignments were done using a loop with Clustal Omega V. 1.2.4 (\$ for filename in \*.faa; `do clustalo -i "$filename" -o clustalo_out/${filename%coral} -v; done`) and resulting alignments were concatenated using `catfasta2phym1 perl script` (<https://github.com/nylander/catfasta2phym1>) `./catfasta2phym1.pl *.faa --verbose > outv.phy`. PhyML 3.0 (14) with smart model selection (15) using Akaike information criterion was used for phylogenetic analysis (maximum-likelihood) with 100 regular bootstrap replicates and FigTree (<http://tree.bio.ed.ac.uk/software/figtree/>) for tree visualization.

BLAST Ring Image Generator (BRIG) was used for visualization of the other sequenced genomes compared to the closed CDC 4709-98 genome (**Figure E**) (16). Average amino acid and nucleic acid identity (**Figure C**) was calculated using GET\_HOMOLOGUES package version 30062017 (11). In brief, a pangenome matrix was generated using the

OMCL algorithm (`./get_homologues.pl -d dpig_folder -t 0 -M (OMCL)`) for homologues identification. Both, ANI and AAI were calculated with all available clusters (-t 0).  
Commands used: Generation of an AA identity matrix: `$ ./get_homologues.pl -d "gbk-files" -A -t 0 -M` and CDS identity matrix with the command `./get_homologues.pl -d "gbk-files" -a 'CDS' -A -t 0 -M`.

**Table A. Characteristics of *D. pigrum* strains and Illumina genomes in this study.**

| Strain name / (internal strain #) | GB Assembly (BioProject)        | Strain source           | Geography / body site / age     | Median fold coverage | CDS <sup>+</sup> | RNAs <sup>+</sup> | GC (%) <sup>+</sup> | Size (bp) |
|-----------------------------------|---------------------------------|-------------------------|---------------------------------|----------------------|------------------|-------------------|---------------------|-----------|
| KPL1914 (KPL1914)                 | GCA_003263915.2 # (PRJNA379818) | This study              | MA / nostril / adult            | 83                   | 1566             | 72                | 40                  | 1,726,398 |
| CDC 39-95 (KPL1922)               | GCA_003264145.1 (PRJNA379966)   | CDC (2)                 | Canada / sinus / 3 years        | 62                   | 1666             | 80                | 39.7                | 1,859,258 |
| CDC 2949-98 (KPL1930)             | GCA_003264135.1 (PRJNA379966)   | CDC (2)                 | AZ / nasopharyngeal / NA        | 60                   | 1644             | 73                | 39.6                | 1,886,398 |
| CDC 4294-98 (KPL1931)             | GCA_003264085.1 (PRJNA379966)   | CDC (2)                 | SC / blood / 2 months           | 73                   | 1841             | 78                | 39.5                | 2,014,679 |
| CDC 4420-98 (KPL1932)             | GCA_003264065.1 (PRJNA379966)   | CDC (2)                 | TN / blood / 11 years           | 63                   | 1745             | 73                | 39.7                | 1,934,436 |
| CDC 4545-98 (KPL1933)             | GCA_003264045.1 (PRJNA379966)   | CDC (2)                 | AZ / nasopharyngeal / NA        | 128                  | 1680             | 61                | 39.6                | 1,861,299 |
| CDC 4709-98 (KPL1934)             | GCA_003264015.2 # (PRJNA379966) | CDC (2)                 | GA / eye / 2 months             | 81                   | 1686             | 80                | 39.6                | 1,912,682 |
| CDC 4199-99 (KPL1937)             | GCA_003264005.1 (PRJNA379966)   | CDC (2)                 | GA / blood / 1.8 years          | 107                  | 1746             | 85                | 39.6                | 1,976,602 |
| CDC 4791-99 (KPL1938)             | GCA_003263975.1 (PRJNA379966)   | CDC (2)                 | AZ / nasopharyngeal / NA        | 61                   | 1651             | 80                | 39.6                | 1,873,869 |
| CDC 4792-99 (KPL1939)             | GCA_003263965.1 (PRJNA379966)   | CDC (2)                 | AZ / nasopharyngeal / NA        | 92                   | 1704             | 80                | 39.4                | 1,893,917 |
| SS-1342 [NCFB2967] [ATCC 51524]   | GCA_000245815.1 *               | BROAD/HMP R91/1468 (17) | England / spinal cord (autopsy) | 200                  | 1651             | 31                | 39.6                | 1,846,028 |

# version .1 is the Illumina assembly and version .2 is the Illumina-corrected PacBio assembly

+ as determined by RAST annotation (see text)

\* sequenced by the BROAD institute for the Human Microbiota Project

**Table B. Assembly characteristics of *D. pigrum* Illumina genomes in this study.**

| CDC / internal strain # |         | Nodes [N] | N50 [bp] | Max [bp] | Total [bp] | Reads [N] |
|-------------------------|---------|-----------|----------|----------|------------|-----------|
|                         | KPL1914 | 107       | 87,900   | 210,575  | 1,726,398  | 1,640,818 |
| 39-95                   | KPL1922 | 138       | 153,015  | 273,357  | 1,859,258  | 1,819,350 |
| 2949-98                 | KPL1930 | 179       | 127,744  | 456,484  | 1,886,398  | 1,699,318 |
| 4294-98                 | KPL1931 | 139       | 88,498   | 198,469  | 2,014,679  | 2,357,776 |
| 4420-98                 | KPL1932 | 134       | 209,743  | 328,871  | 1,934,436  | 2,098,746 |
| 4545-98                 | KPL1933 | 50        | 283,724  | 492,087  | 1,861,299  | 2,738,030 |
| 4709-98                 | KPL1934 | 142       | 110,284  | 268,980  | 1,912,682  | 2,198,156 |
| 4199-99                 | KPL1937 | 109       | 128,019  | 379,812  | 1,976,602  | 2,528,652 |
| 4791-99                 | KPL1938 | 129       | 132,767  | 316,186  | 1,873,869  | 1,831,854 |
| 4792-99                 | KPL1939 | 86        | 253,067  | 460,850  | 1,893,917  | 2,039,094 |



**Figure A. The conservative core genome of 11 *D. pigrum* strains encodes 1200 orthologs.** A Venn diagram generated using the bidirectional best-hits (BDBH), cluster of orthologous groups (COG) triangle, and OrthoMCL (OMCL) algorithms identified predicted protein orthologs (RAST annotation) shared between the 11 *D. pigrum* genomes (GET\_HOMOLOGUES package version 02012019) (11). Flag -t 11 was used to only include clusters containing single-copy orthologs from all input species since these are likely the most reliable ortholog predictions.

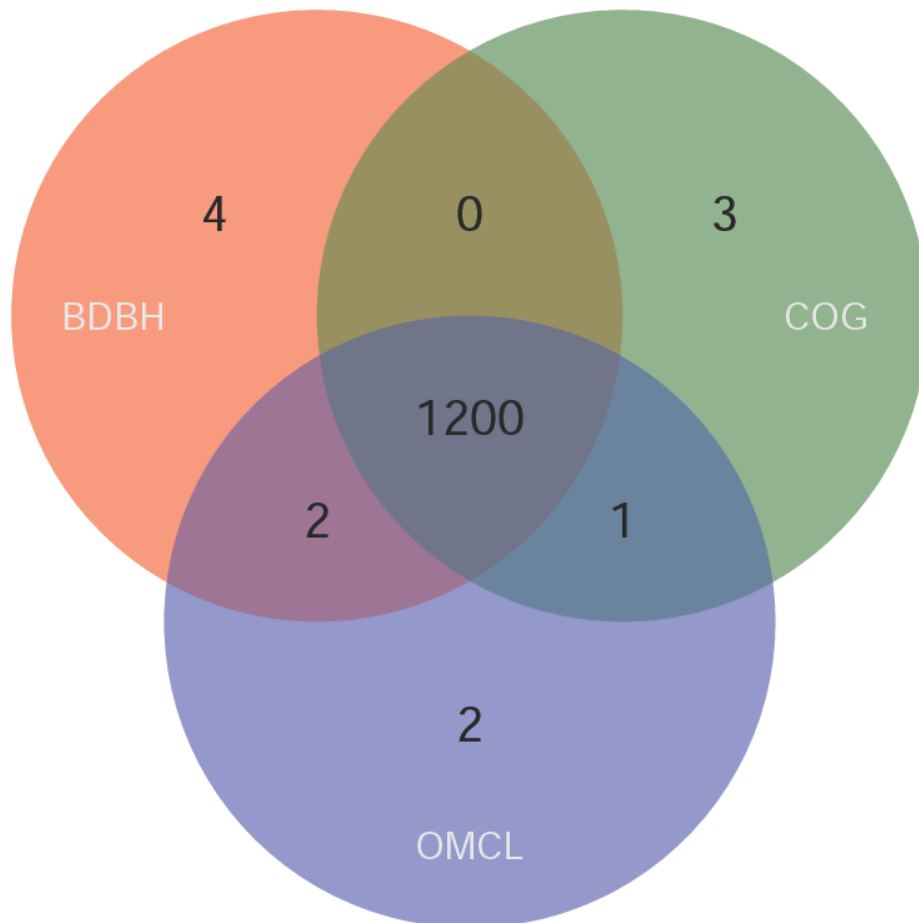

**Figure B. Core, shell and cloud pangenome of 11 *Dolosigranulum pigrum* strains.**

The pangenome of the 11 *D. pigrum* strains includes an estimated core of 1216, soft core of 116, shell of 373 and cloud of 1024 genes (CDS), as determined by the parse\_pangenome\_matrix.pl script (using the OMCL / COG intersection) of the GET\_HOMOLOGUES package version 02012019 (11). The core genome is composed of genes that are present in all strains and soft core contains clusters present in 10 genomes but not the core as defined in (12). Cloud is defined as genes only present in a few genomes (cut-off is defined as the class next to the most populated non-core cluster class). Shell genes are the remaining genes and displayed sorted to the number of genomes in which these are present ( $n = 3-9$ ).

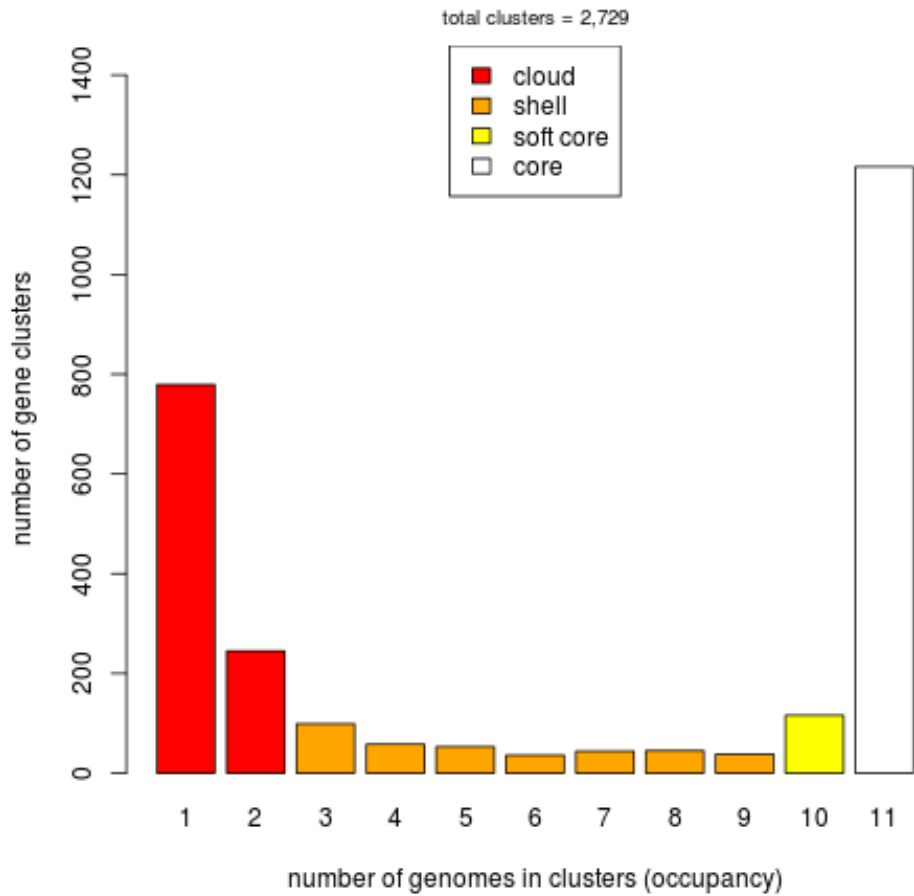

**Table C. Distribution by strain of genes in the core, soft core, shell and cloud *D. pigrum* genome.\***

| <b>CDC or other strain #</b> | <b>Internal reference</b> | <b>Cloud [N]</b> | <b>Shell [N]</b> | <b>Soft core [N]</b> | <b>Core [N]</b> |
|------------------------------|---------------------------|------------------|------------------|----------------------|-----------------|
| KPL1914                      | KPL1914                   | 79               | 135              | 89                   | 1216            |
| 39-95                        | KPL1922                   | 81               | 189              | 109                  | 1216            |
| 2949-98                      | KPL1930                   | 88               | 167              | 113                  | 1216            |
| 4294-98                      | KPL1931                   | 243              | 183              | 110                  | 1216            |
| 4420-98                      | KPL1932                   | 134              | 205              | 114                  | 1216            |
| 4545-98                      | KPL1933                   | 102              | 202              | 96                   | 1216            |
| 4709-98                      | KPL1934                   | 105              | 185              | 111                  | 1216            |
| 4199-99                      | KPL1937                   | 186              | 174              | 94                   | 1216            |
| 4791-99                      | KPL1938                   | 73               | 192              | 108                  | 1216            |
| 4792-99                      | KPL1939                   | 110              | 194              | 108                  | 1216            |
| ATCC51524                    |                           | 68               | 194              | 108                  | 1216            |

\* These results were determined as described for Figure S3.

**Figure C. The (i) average nucleotide identities (ANI) and (ii) amino acid identities (AAI) show a high degree of conservation across all 11 *D. pigrum* genomes. Average identity matrices of clustered coding sequences were calculated using GET\_HOMOLOGUES with the OrthoMCL algorithm. Both ANI and AAI were calculated with all available clusters (-t 0).**

**i**

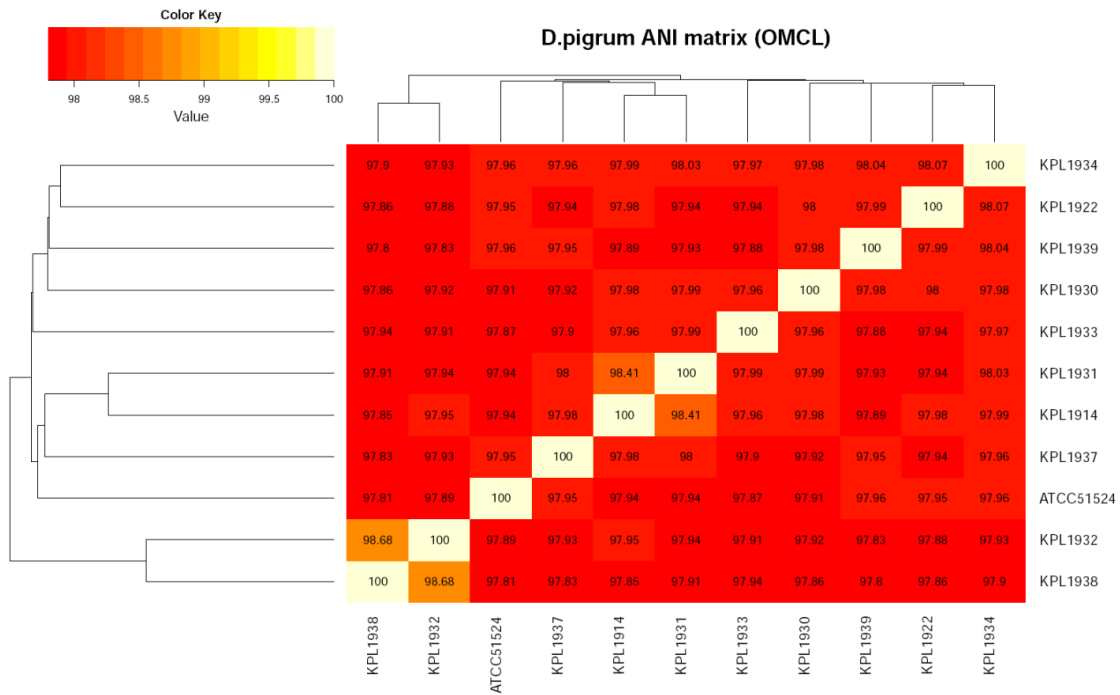

ii

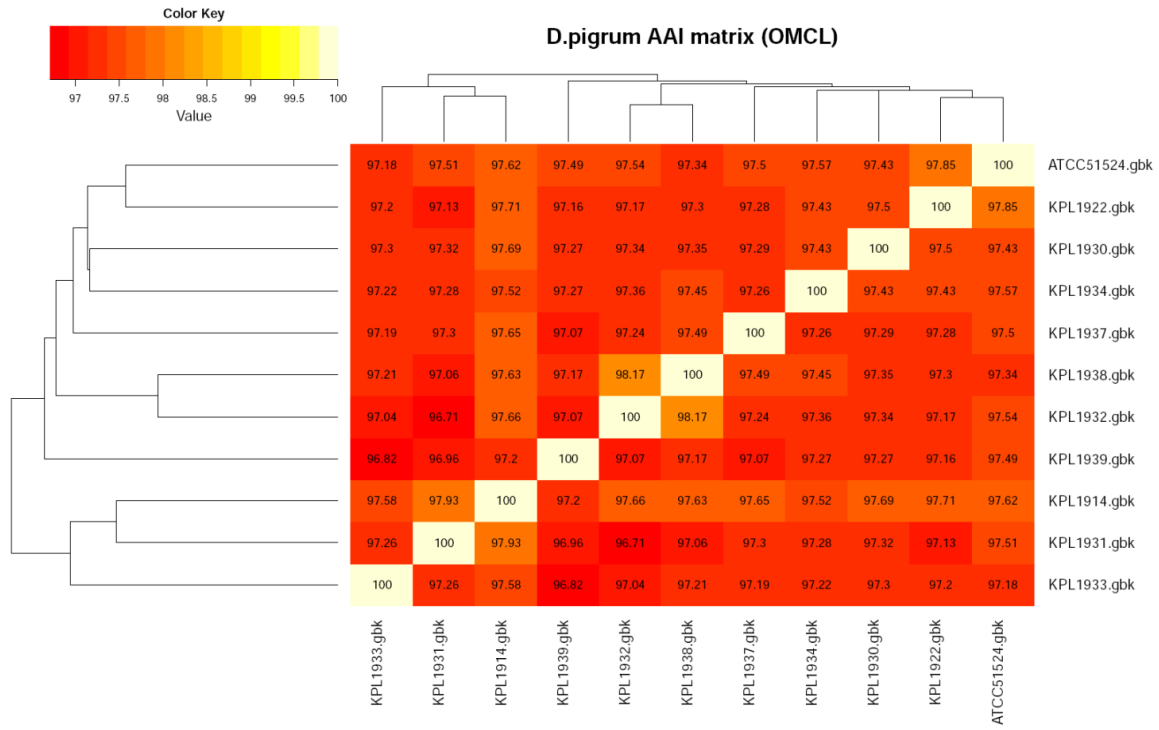

**Figure D. Comparative analysis of two *D. pigrum* genomes reveals a high degree of synteny.** Multiple genome alignment for synteny analysis of the two closed *D. pigrum* genomes CDC 4709-98 and KPL1914 was performed using MAUVE (13). Locally collinear blocks (color coded) and similarity profiles are presented, and genome boundaries are indicated (red bar after non-aligned sequences, i.e., sequences that are unique for the corresponding genome).

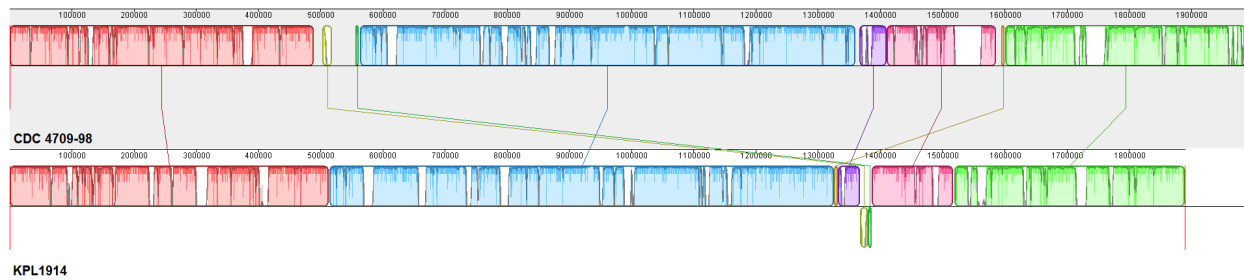

**Figure E. *D. pigrum* genomes BLAST ring comparisons.** BLAST Ring Image Generator (BRIG) version 0.95 (16) was used for visualization of the sequenced genomes with the closed genome of CDC 4709-98 as a reference. (i) Closed genome of CDC 4709-98 with GC plots (ii) Closed genome of KPL 1914 with GC plots (iii) BLASTN based comparison of the closed genomes of CDC 4709-98 and KPL 1914 (iv) BLASTN based comparison of CDC 4709-98 and the remaining 10 Illumina contig-based genomes as well as ATCC 51524.

i

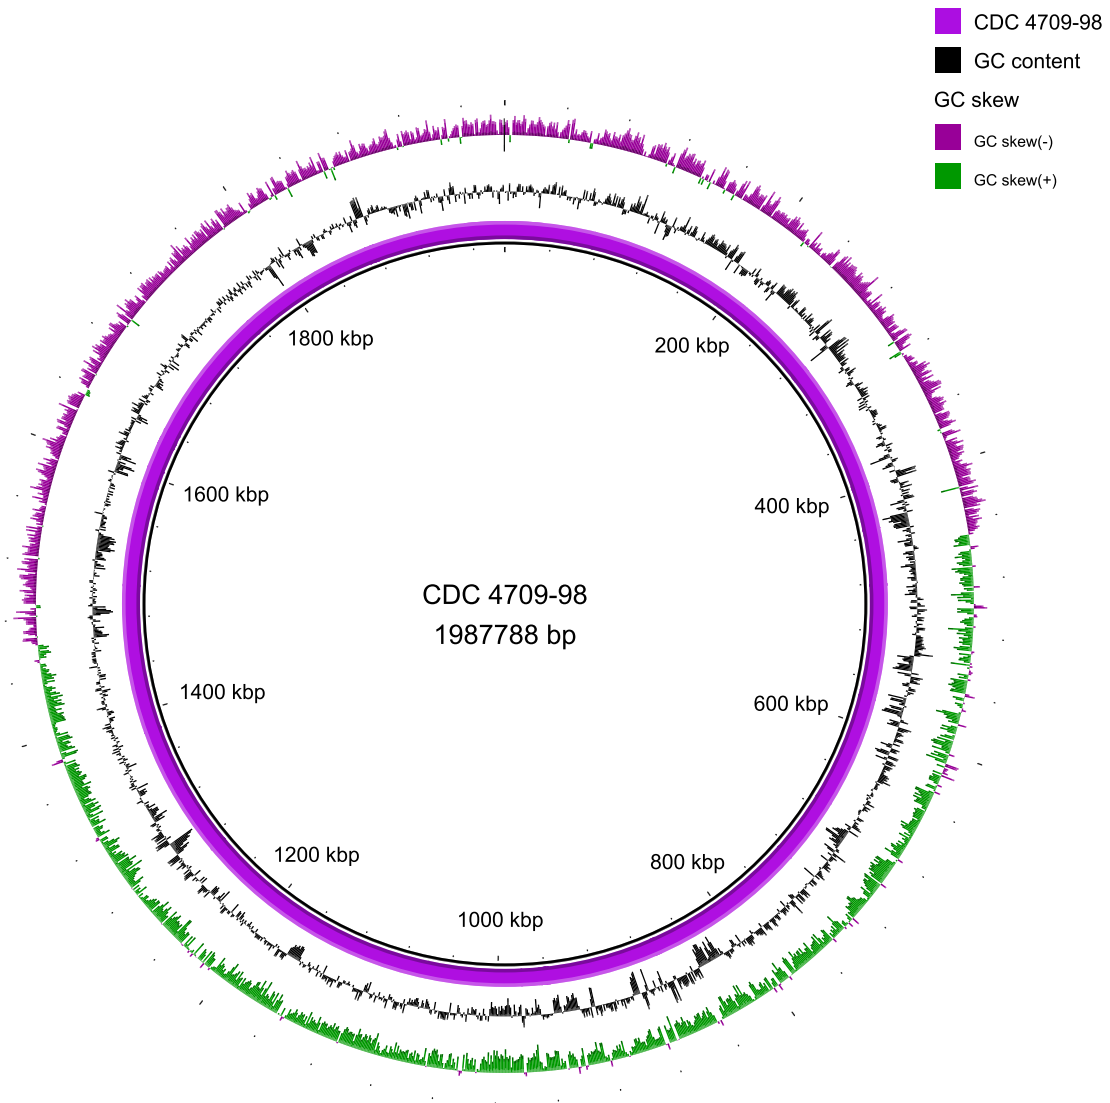

ii

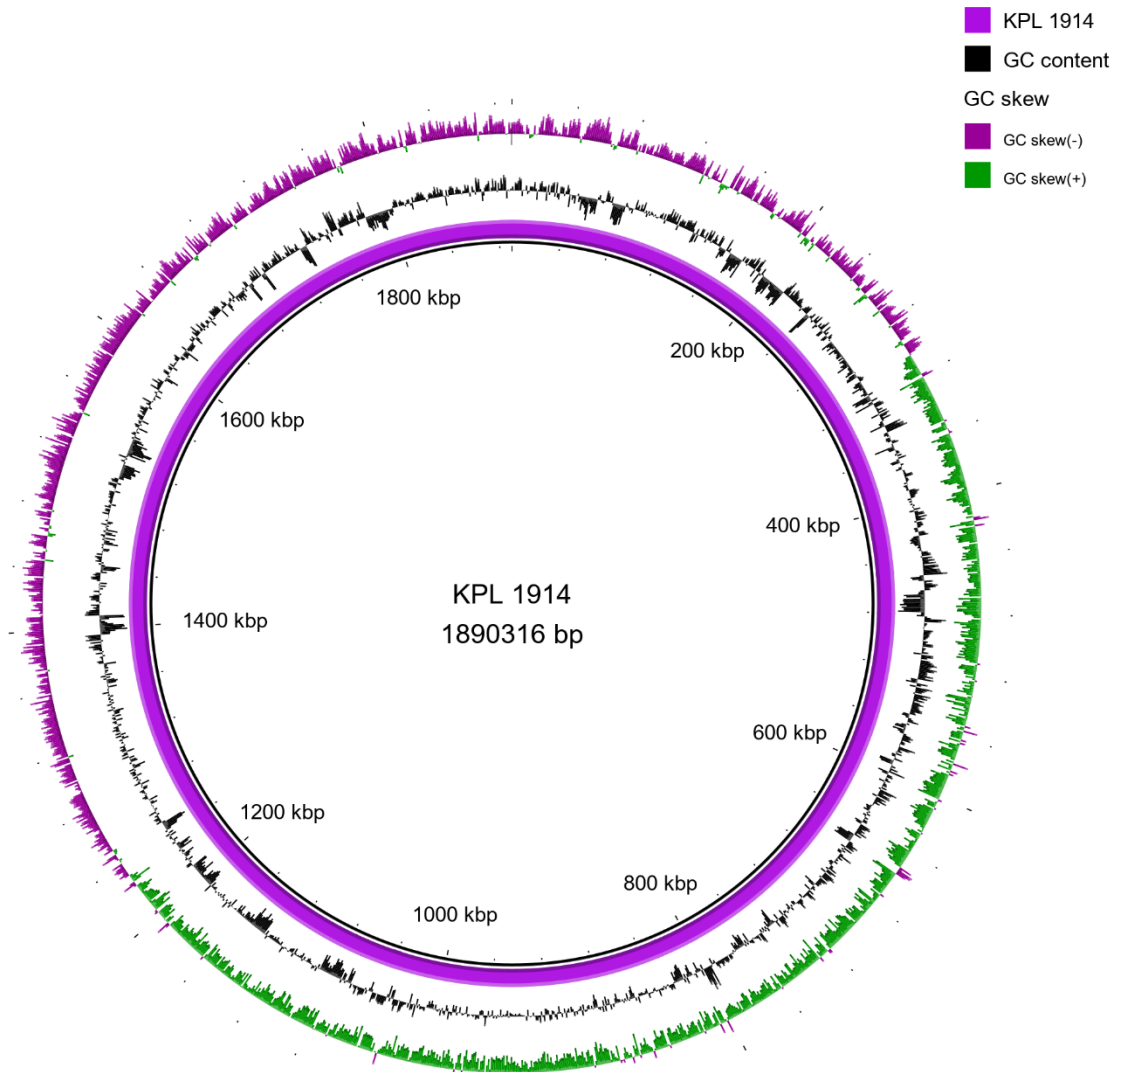



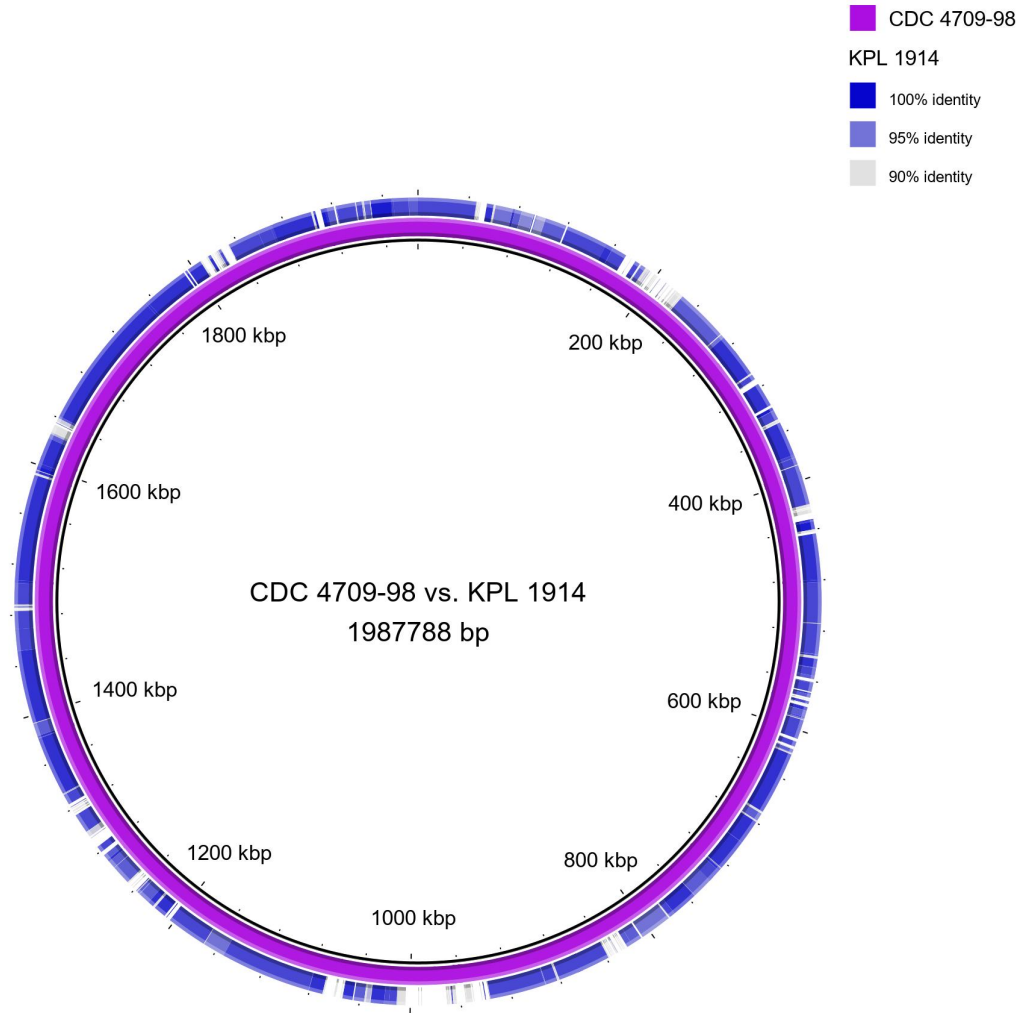

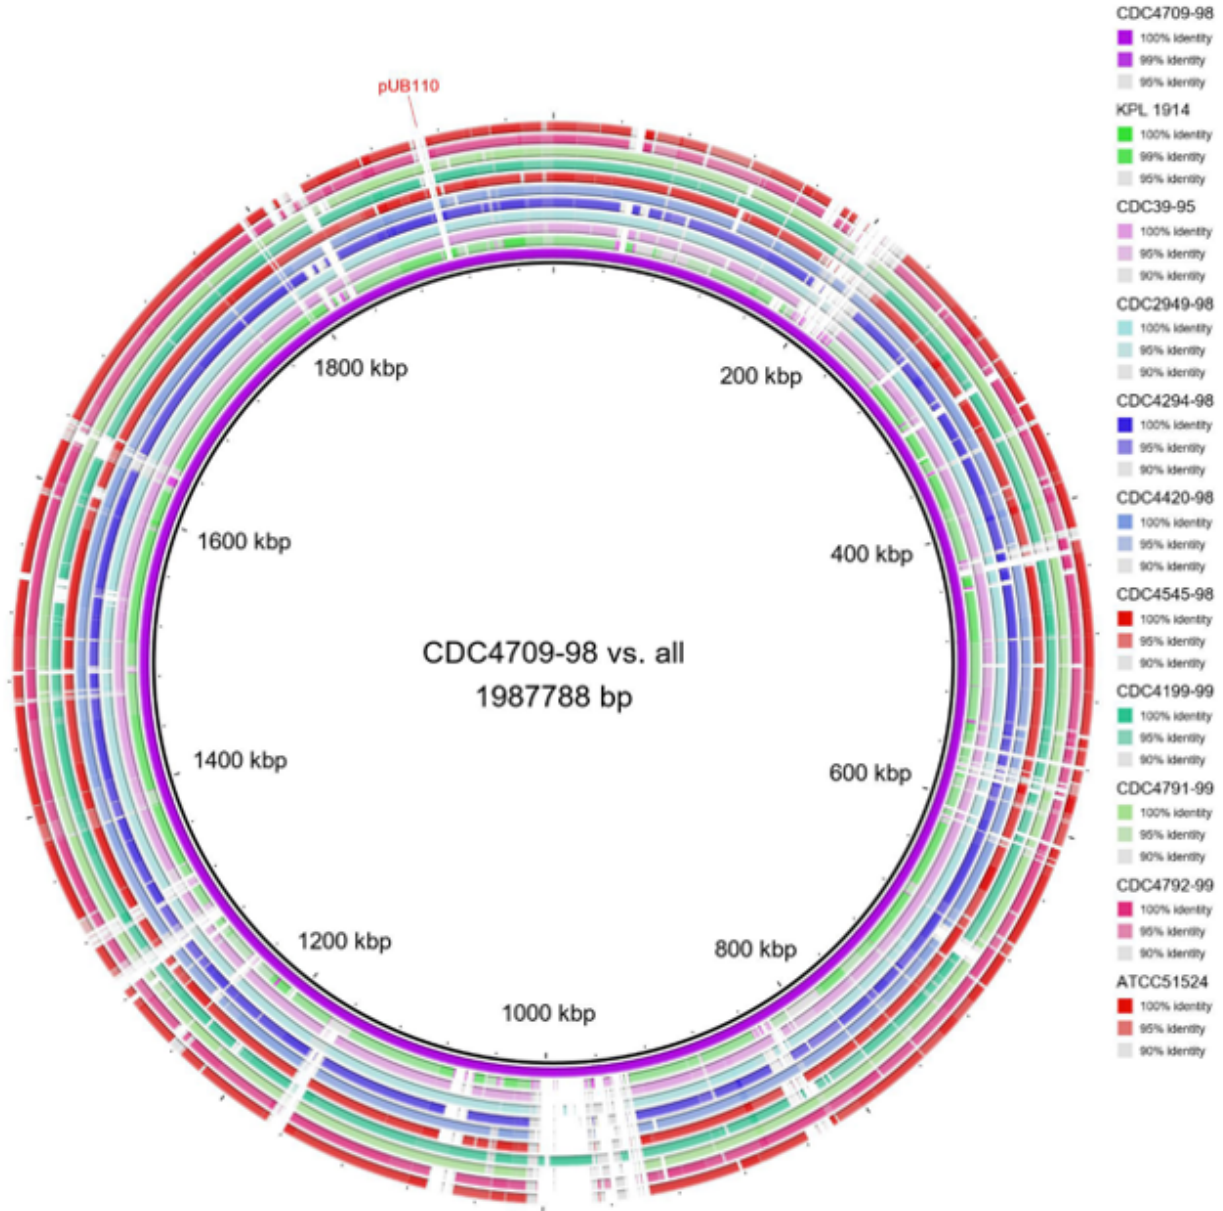

**Figure F. Phylogenetic relationship between the 11 *D. pigrum* strains.** *D. pigrum* phylogenetic trees were constructed by using concatenated alignments of the intersection of predicted core genes (BDBH, COG, and OMCL, see above). Amino acids were aligned using Clustal Omega V.1.2.4 (18) and a maximum likelihood phylogenetic tree was generated using the LG model of amino-acid replacement matrix (19) as selected by smart model selection with Akaike information criterion (15) and 100 bootstrap replicates for branch support with PhyML (phylogenetic maximal likelihood) V. 3.0 (14) and visualized using FigTree V.1.4.4. A BIONJ distance-based tree was used as a starting tree to be redefined by the maximum likelihood algorithm. Bootstrap support values from 100 replicates are indicated above the branches. (i) Core genome amino acid tree of the 11 *D. pigrum* genomes. (ii) Core genome amino acid tree with *A. otitis* ATCC 51267 as an outgroup. Core genome size decreased to 866 clusters when including *A. otitis*.

i

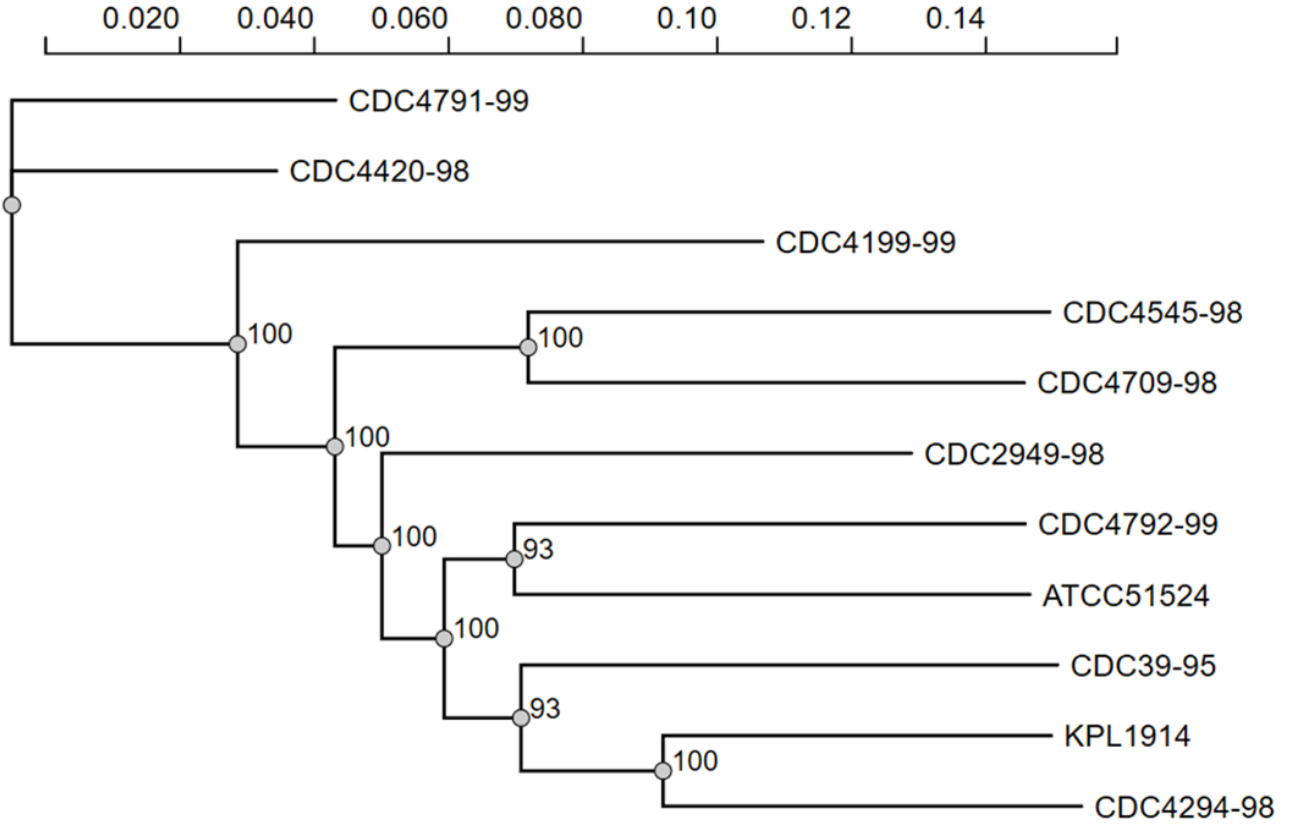

ii

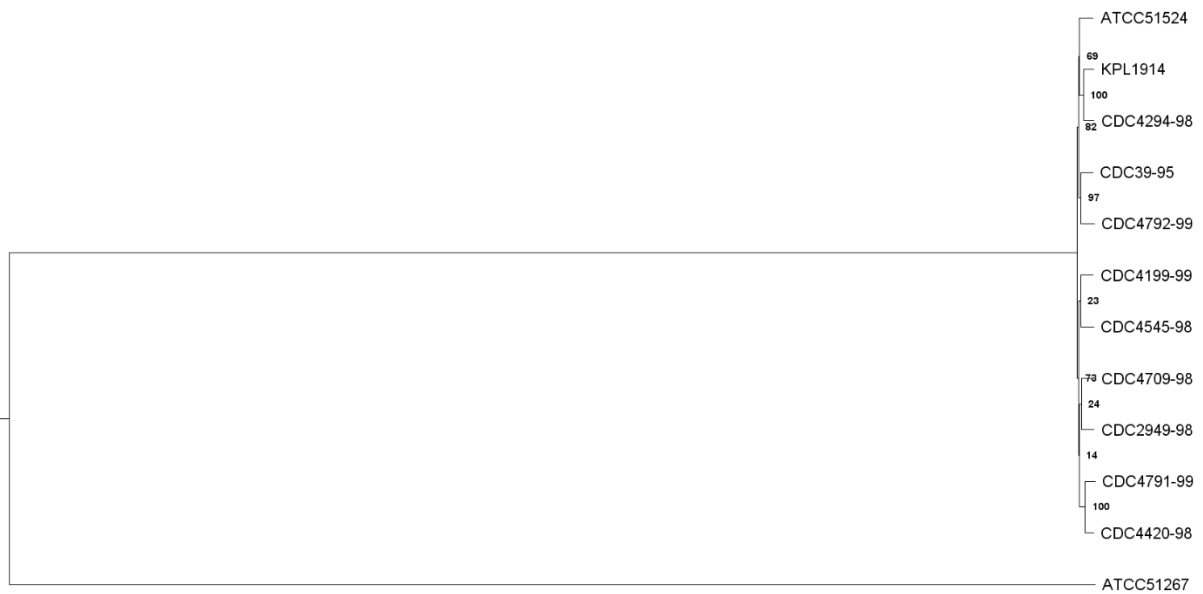

## References: Supplemental File S1

1. Yarza P, Richter M, Peplies J, Euzéby J, Amann R, Schleifer KH, Ludwig W, Glockner FO, Rossello-Mora R. 2008. The All-Species Living Tree project: a 16S rRNA-based phylogenetic tree of all sequenced type strains. *Syst Appl Microbiol* 31:241-50.
2. Laclaire L, Facklam R. 2000. Antimicrobial susceptibility and clinical sources of *Dolosigranulum pigrum* cultures. *Antimicrob Agents Chemother* 44:2001-3.
3. Drancourt M, Roux V, Fournier PE, Raoult D. 2004. rpoB gene sequence-based identification of aerobic Gram-positive cocci of the genera *Streptococcus*, *Enterococcus*, *Gemella*, *Abiotrophia*, and *Granulicatella*. *J Clin Microbiol* 42:497-504.
4. Altschul SF, Gish W, Miller W, Myers EW, Lipman DJ. 1990. Basic local alignment search tool. *J Mol Biol* 215:403-10.
5. Zerbino DR, Birney E. 2008. Velvet: algorithms for *de novo* short read assembly using de Bruijn graphs. *Genome Res* 18:821-9.
6. Aziz RK, Bartels D, Best AA, DeJongh M, Disz T, Edwards RA, Formsma K, Gerdes S, Glass EM, Kubal M, Meyer F, Olsen GJ, Olson R, Osterman AL, Overbeek RA, McNeil LK, Paarmann D, Paczian T, Parrello B, Pusch GD, Reich C, Stevens R, Vassieva O, Vonstein V, Wilke A, Zagnitko O. 2008. The RAST Server: rapid annotations using subsystems technology. *BMC Genomics* 9:75.
7. Seemann T. 2014. Prokka: Rapid prokaryotic genome annotation. *Bioinformatics* 30:2068-9.
8. Chin CS, Alexander DH, Marks P, Klammer AA, Drake J, Heiner C, Clum A, Copeland A, Huddleston J, Eichler EE, Turner SW, Korlach J. 2013. Nonhybrid, finished microbial genome assemblies from long-read SMRT sequencing data. *Nat Methods* 10:563-9.
9. Pettigrew MM, Ahearn CP, Gent JF, Kong Y, Gallo MC, Munro JB, D'Mello A, Sethi S, Tettelin H, Murphy TF. 2018. *Haemophilus influenzae* genome evolution during persistence in the human airways in chronic obstructive pulmonary disease. *Proc Natl Acad Sci U S A* 115:E3256-E3265.
10. Hilty M, Wuthrich D, Salter SJ, Engel H, Campbell S, Sa-Leao R, de Lencastre H, Hermans P, Sadowy E, Turner P, Chewapreecha C, Diggle M, Pluschke G, McGee L, Eser OK, Low DE, Smith-Vaughan H, Endimiani A, Kuffer M, Dupasquier M, Beaudoin E, Weber J, Bruggmann R, Hanage WP, Parkhill J, Hathaway LJ, Muhlemann K, Bentley SD. 2014. Global phylogenomic analysis of nonencapsulated *Streptococcus pneumoniae* reveals a deep-branching classic

- lineage that is distinct from multiple sporadic lineages. *Genome Biol Evol* 6:3281-94.
11. Contreras-Moreira B, Vinuesa P. 2013. GET\_HOMOLOGUES, a versatile software package for scalable and robust microbial pangenome analysis. *Appl Environ Microbiol* 79:7696-701.
  12. Kaas RS, Friis C, Ussery DW, Aarestrup FM. 2012. Estimating variation within the genes and inferring the phylogeny of 186 sequenced diverse *Escherichia coli* genomes. *BMC Genomics* 13:577.
  13. Darling AE, Mau B, Perna NT. 2010. progressiveMauve: multiple genome alignment with gene gain, loss and rearrangement. *PLoS One* 5:e11147.
  14. Guindon S, Dufayard JF, Lefort V, Anisimova M, Hordijk W, Gascuel O. 2010. New algorithms and methods to estimate maximum-likelihood phylogenies: assessing the performance of PhyML 3.0. *Syst Biol* 59:307-21.
  15. Lefort V, Longueville JE, Gascuel O. 2017. SMS: Smart Model Selection in PhyML. *Mol Biol Evol* 34:2422-2424.
  16. Alikhan NF, Petty NK, Ben Zakour NL, Beatson SA. 2011. BLAST Ring Image Generator (BRIG): simple prokaryote genome comparisons. *BMC Genomics* 12:402.
  17. Aguirre M, Morrison D, Cookson BD, Gay FW, Collins MD. 1993. Phenotypic and phylogenetic characterization of some *Gemella*-like organisms from human infections: description of *Dolosigranulum pigrum* gen. nov., sp. nov. *J Appl Bacteriol* 75:608-12.
  18. Sievers F, Wilm A, Dineen D, Gibson TJ, Karplus K, Li W, Lopez R, McWilliam H, Remmert M, Soding J, Thompson JD, Higgins DG. 2011. Fast, scalable generation of high-quality protein multiple sequence alignments using Clustal Omega. *Mol Syst Biol* 7:539.
  19. Le SQ, Gascuel O. 2008. An improved general amino acid replacement matrix. *Mol Biol Evol* 25:1307-20.
