# Supplementary material for: Dolosigranulum pigrum Cooperation and Competition in Human Nasal Microbiota
Source: PubMed Central journal article supplement (PMC7485692; doi:10.1128/msphere.00852-20), 2020-09-09

**A**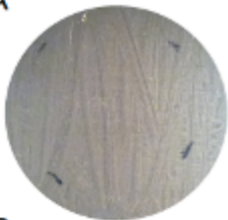**B**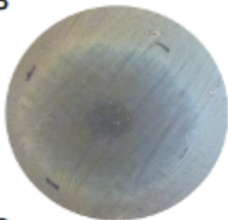**C**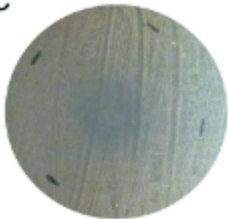**D**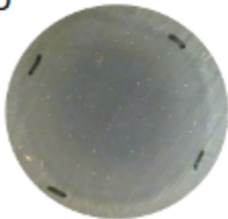

Supplement: mSphere.00852-20-sf002.pdf [file mSphere.00852-20-sf002.pdf]
